# Supplementary material for: Aerobic Growth of Rhodococcus aetherivorans BCP1 Using Selected Naphthenic Acids as the Sole Carbon and Energy Sources
Source: PubMed Central journal article supplement (PMC5906575; doi:10.3389/fmicb.2018.00672), 2018-04-12
Supplement: Data_Sheet_1.pdf [file Data_Sheet_1.pdf]

## Supplementary Material

### Aerobic growth of *Rhodococcus aetherivorans* BCP1 using selected naphthenic acids as the sole carbon and energy sources

Presentato A<sup>†1,2</sup>, Cappelletti M<sup>†\*1</sup>, Sansone A<sup>3</sup>, Ferreri C<sup>3</sup>, Piacenza E<sup>2</sup>, Demeter M<sup>2</sup>, Crognale S<sup>4</sup>, Petruccioli M<sup>4</sup>, Milazzo G<sup>1</sup>, Fedi S<sup>1</sup>, Steinbüchel A<sup>5,6</sup>, Turner RJ<sup>2§</sup>, Zannoni D<sup>1§</sup>

† These authors contributed equally to the work.

§ These authors share senior authorship.

\* Correspondence:

Dr Martina Cappelletti, Department of Pharmacy and Biotechnology, University of Bologna, Via Irnerio 42, 40126 Bologna, Italy, [martina.cappelletti2@unibo.it](mailto:martina.cappelletti2@unibo.it), [marty.cap@gmail.com](mailto:marty.cap@gmail.com)

#### Supplementary Tables

**Supplementary Table S1** Constituent model NAs contained within the 8 $\chi$ NA mixture at equimolar (1.7 mM) concentrations and water solubility values<sup>a</sup>

| Naphthenic Acid                                                        | Abbrev. | Structure                                                                             |
|------------------------------------------------------------------------|---------|---------------------------------------------------------------------------------------|
| Cyclohexane carboxylic acid                                            | CHCA    | 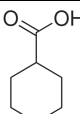 |
| Cyclohexane acetic acid                                                | CHAA    |  |
| Hexanoic acid                                                          | HA      |  |
| Decanoic acid                                                          | DA      |  |
| 3-Methyl-1-cyclohexane carboxylic acid ( <i>cis</i> and <i>trans</i> ) | mCHCA   |  |
| 1-Adamantane carboxylic acid                                           | ACA     |  |
| Cyclohexane butyric acid                                               | CHBA    |  |
| Cyclopentane carboxylic acid                                           | CPCA    |  |

<sup>a</sup> The stock solutions of each NA is prepared as sodium salt naphthenate which is described in the literature to be soluble in water (see Material and Methods).

**Supplementary Table S2** RTqPCR Primers used for RT-qPCR experiments of *chcpcA* gene cluster and the 16S rRNA gene.

| <b><i>Orfs</i></b> | <b>Locus tag</b> | <b>Forward Primer</b> | <b>Reverse Primer</b> |
|--------------------|------------------|-----------------------|-----------------------|
| <i>orf1</i>        | N505_0103275     | tctcggcgatcactctcac   | atctcgaacatgccgctct   |
| <i>orf2</i>        | N505_0103270     | atcaacgtcaactgcgtgtg  | aacgggatggccttgatca   |
| <i>orf3</i>        | N505_0103265     | gatgctctcgtcgttcaagc  | gtggccttgtaatgcagctt  |
| <i>orf4</i>        | N505_0103260     | cttcggcaagctcaacaaca  | gatgacgggtactcgagg    |
| <i>orf5</i>        | N505_0103255     | tacaacgccatcctgatcga  | tggtcatgtcggtcaggtac  |
| <i>tetR-like 1</i> | N505_0103250     | cgcacagggttccatcagat  | ctcctccttgttgccgaagt  |
| <i>orf6</i>        | N505_0103245     | gcgatgatggagtcctggag  | gatgcgggcgaacacgtc    |
| <i>tetR-like 2</i> | N505_0103240     | gtgatgaaccgggtc gatgt | gtgtagatggccccgaagtg  |
| <i>16S rRNA</i>    | N505_0111375     | attagtggcgaacgggtgag  | cccgaggtcctatccggtat  |

**Supplementary Table S3** List of ORFs (locus tags and gene products) analysed through semi-quantitative RT-PCR and corresponding transcriptional inducti results obtained on CPCA, CHCA and succinate.

| Product (GenBank)                      | Locus tag    | Protein ID | Forward Primer        | Reverse Primer       | CPCA | CHCA | Succinate | Inducer <sup>b</sup> |
|----------------------------------------|--------------|------------|-----------------------|----------------------|------|------|-----------|----------------------|
| Cyclohexanone monooxygenase            | N505_0100500 | KDE14614   | gtgacctcgatggtgtggaa  | gcacgtcgatctcgtactcg |      |      |           | ND                   |
|                                        | N505_0100750 | KDE14662   | gcagccggctacttcatctcc | aagtcgacgtggctcctgat |      |      |           | ND                   |
|                                        | N505_0105690 | KDE14308   | ggcgagatcttccactcc    | tgcaggttgcggtgttattc |      |      |           | ND                   |
|                                        | N505_0118125 | KDE12215   | ctgccgtactccagcagtg   | cgcagcatcgtccagtagtc |      |      |           | ND                   |
|                                        | N505_0118260 | KDE12242   | tcgaggtcgacgagagtgaa  | atgaacggcatgaagacacg |      |      |           | ND                   |
|                                        | N505_0119480 | KDE11803   | gcaagatgctcggggactac  | tcgaagaacgggaaggtgat |      |      |           | ND                   |
|                                        | N505_0122350 | KDE10976   | ccggccctgtactcgtactc  | ggagctggctctcgatcat  |      |      |           | ND                   |
|                                        | N505_0122450 | KDE10995   | cctggtctggaaccgctat   | cccttgctcgtgaactcctc |      |      |           | ND                   |
|                                        | N505_0122535 | KDE11012   | gacgtggacagccacgacta  | gcggttgaaggtctcgtacc |      |      |           | ND                   |
|                                        | N505_0125330 | KDE11542   | ctgcagcagtggaactggac  | gatgttggtgaacgggctct |      |      |           | ND                   |
|                                        | N505_0125485 | KDE11570   | ggactggagccgaatcttfg  | gcatgtcgaggatgtggaag |      |      |           | ND                   |
|                                        | N505_0127890 | KDE10307   | gcggcaagatgttccactc   | gggacgggtcacgtagttct |      |      |           | ND                   |
| <i>p</i> -Hydroxybenzoate hydroxylase  | N505_0123160 | KDE11135   | agcacgaggtcaacaaggac  | gacatccaccacgagaagtg |      |      |           | ND                   |
| 2-Hydroxycyclohexane-CoA dehydrogenase | N505_0118185 | KDE12227   | cttcgacctgaacggaaagg  | ctcggagcacagccacag   | ND   |      |           | ND                   |
|                                        | N505_0103270 | KDE15144   | atgagcaacatcgcactggt  | gaacgggatggccttgat   | ND   |      |           | ND                   |
| Long-chain-fatty-acid-CoA ligase       | N505_0118930 | KDE11696   | ccgacatggtgaccgaggtg  | cggtggtagggagttgatcc |      |      |           | ND                   |
|                                        | N505_0103265 | KDE15143   | cgacaccgaactcaccgata  | aacttgccctctcctggtc  | ND   |      |           |                      |
| Enoyl-CoA hydratase                    | N505_0107140 | KDE14076   | aactgatcgtgaggtggtg   | gccatgccttcttctggt   |      |      |           | ND                   |
|                                        | N505_0103245 | KDE15139   | gtcaccacacgcgaagacc   | gacgaatcctccagcaagc  | ND   |      |           |                      |
| Naphthoate synthase                    | N505_0118865 | KDE11684   | ctgatttcaccgcattcagc  | agcgactgctgagcacctt  |      |      |           | ND                   |
|                                        | N505_0103275 | KDE15145   | gaccgtgttcgaggacatca  | gaggccctcgtcggactt   | ND   |      |           | ND                   |
| Alkane 1-monooxygenase (AlkB)          | N505_0120250 | KDE10575   | tacatcgagcacaaccgcggc | tgacgatgtggtcggagtt  |      |      |           |                      |
| Propane monooxygenase (PrmA)           | N505_0124220 | KDE11344   | gtacggcaccaaggaccgcc  | gagggtcttgcctcgtcgc  |      |      |           |                      |
| 16S rRNA <sup>a</sup>                  | N505_0111375 |            | agagtttgatcmtggctcag  | tacggytacctttagcactt |      |      |           | ND                   |

<sup>a</sup> Gene retrotranscribed as a positive control of the RT-PCR experiment

<sup>b</sup> Substrate that has been detected as transcriptional inducer in previous studies; hexane (C<sub>6</sub>) for *alkB* gene, propane (C<sub>3</sub>) for *prm* gene

**Supplementary Table S4** Percentage of damaged or dead cells obtained through cytofluorimetry analysis of BCP1 cell cultures grown on glucose (0.1% w/v) or NAs (500 mg/L)<sup>a</sup>

| Growth substrate | Hours of growth |        |        |        |
|------------------|-----------------|--------|--------|--------|
|                  | 0 h             | 3 h    | 9 h    | 30 h   |
| Glucose          | 5.5 %           | 5.4 %  | 5.0 %  | 9.6 %  |
| CPCA             | 7.0 %           | 59.0 % | 39.5 % | 19.7 % |
| CHCA             | 6.6 %           | 58.5 % | 4.4 %  | 5.8 %  |
| None (MSM only)  | 6 %             | -      | -      | 14.0 % |

<sup>a</sup> The % of dead cells was measured as number of [dead cells (red fluorescent)]/ [viable cells (green fluorescent) + dead cells (red fluorescent)] \* 100

**Supplementary Table S5** ANOVA test performed on fatty acid composition of BCP1 cells grown on glucose, CHCA and CPCA<sup>a</sup>

|           | GLU/CHCA        | CHCA/CPCA | GLU/CPCA |
|-----------|-----------------|-----------|----------|
| C 14:0    | NS <sup>b</sup> | NS        | NS       |
| C 15:0    | NS              | P < 0.05  | NS       |
| C 16:0    | P < 0.05        | P < 0.05  | P < 0.05 |
| 16:1 6 C  | NS              | NS        | NS       |
| 16:1 9 C  | NS              | NS        | NS       |
| Me 16:0   | NS              | NS        | NS       |
| Me 17:0   | NS              | NS        | NS       |
| 18:0      | NS              | NS        | NS       |
| 18:19 t   | NS              | NS        | NS       |
| 18:19 C   | NS              | NS        | NS       |
| 18:1 11 C | NS              | NS        | NS       |
| Me 18:0   | NS              | NS        | P < 0.05 |
| 18:2      | P < 0.05        | NS        | NS       |
| SFA       | NS              | NS        | NS       |
| SMBFA     | NS              | NS        | P < 0.05 |
| MUFA      | NS              | NS        | NS       |
| PUFA      | NS              | NS        | NS       |
| C<16      | NS              | NS        | NS       |
| C>16      | NS              | NS        | NS       |
| ODD       | NS              | NS        | NS       |
| EVEN      | NS              | NS        | NS       |

<sup>a</sup> A one-way ANOVA was performed to test the null hypothesis that there were no significant differences in the mean of s.d. of the fatty acid composition obtained with the three C sources, followed by Tukey's post-hoc test. The results obtained were verified by performing a two-sample *t*-test within pairs of strains. Results reflect three experimental replicates for each growth condition.

<sup>b</sup> NS=not statistically significant

**Supplementary Table S6** Genes encoding enzymes possibly involved in TAG, PHA, and PolyP accumulation in *R. aetherivorans* BCP1. NCBI annotation is indicated as well as the Accession number.

| Gene name   | Enzyme name                                                          | Accession # |
|-------------|----------------------------------------------------------------------|-------------|
| <i>phaC</i> | PHA synthase                                                         | KDE13084    |
|             |                                                                      | KDE10636    |
|             |                                                                      | KDE13191    |
|             |                                                                      | KDE11780    |
| <i>phaZ</i> | PHA depolymerase                                                     | KDE11778    |
|             |                                                                      | KDE10868    |
| <i>ppk</i>  | Polyphosphate kinase                                                 | KDE14014    |
| <i>ppx</i>  | Exopolyphosphatase                                                   | KDE15351    |
|             |                                                                      | KDE13580    |
|             |                                                                      | KDE12358    |
| <i>atf</i>  | Wax ester<br>synthase/acyl-<br>CoA:diacylglycerol<br>acyltransferase | KDE15033    |
|             |                                                                      | KDE14033    |
|             |                                                                      | KDE13744    |
|             |                                                                      | KDE13626    |
|             |                                                                      | KDE13627    |
|             |                                                                      | KDE12630    |
|             |                                                                      | KDE13739    |
|             |                                                                      | KDE10687    |

Supplementary Figures

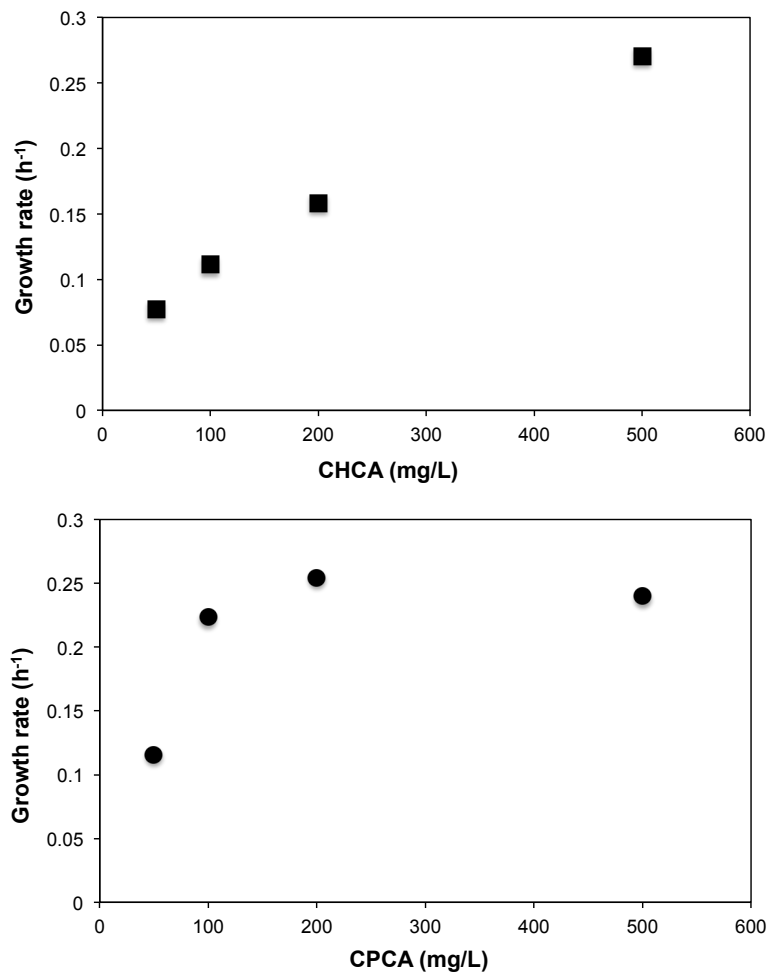

**Supplementary Figure S1.** Growth rate (h<sup>-1</sup>) variation according to the different concentrations of CHCA and CPCA supplied to BCP1 cells growing on MSM.

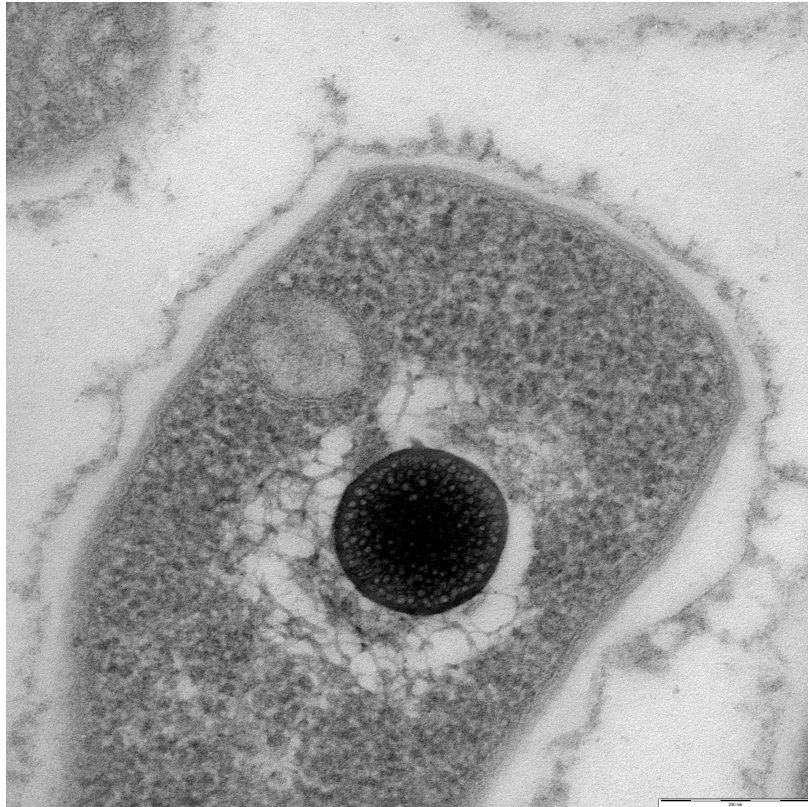

**Supplementary Figure S2.** TEM image showing an intracellular oligobody in a BCP1 cell grown on CHCA (500 mg/L)

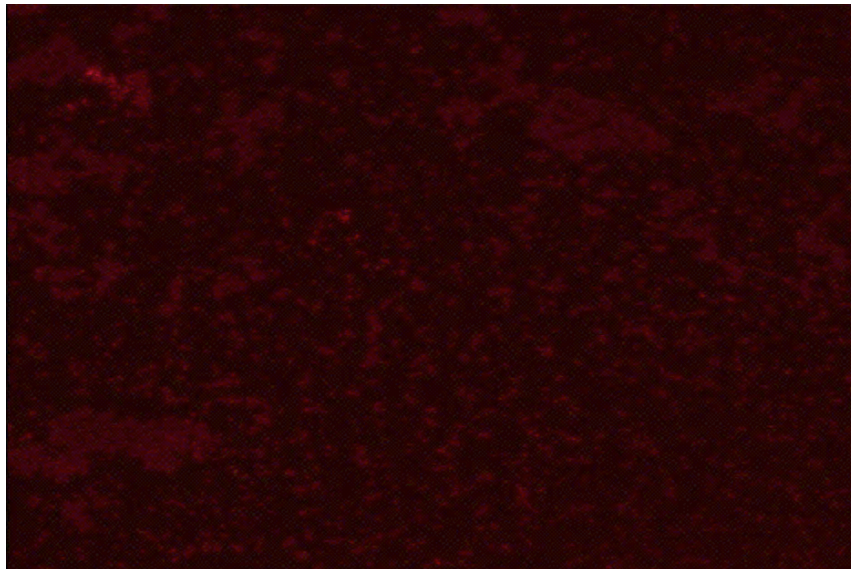

**Supplementary Figure S3.** CLSM image of BCP1 cells grown in LB until exponential phase that were stained with Nile Blue A.

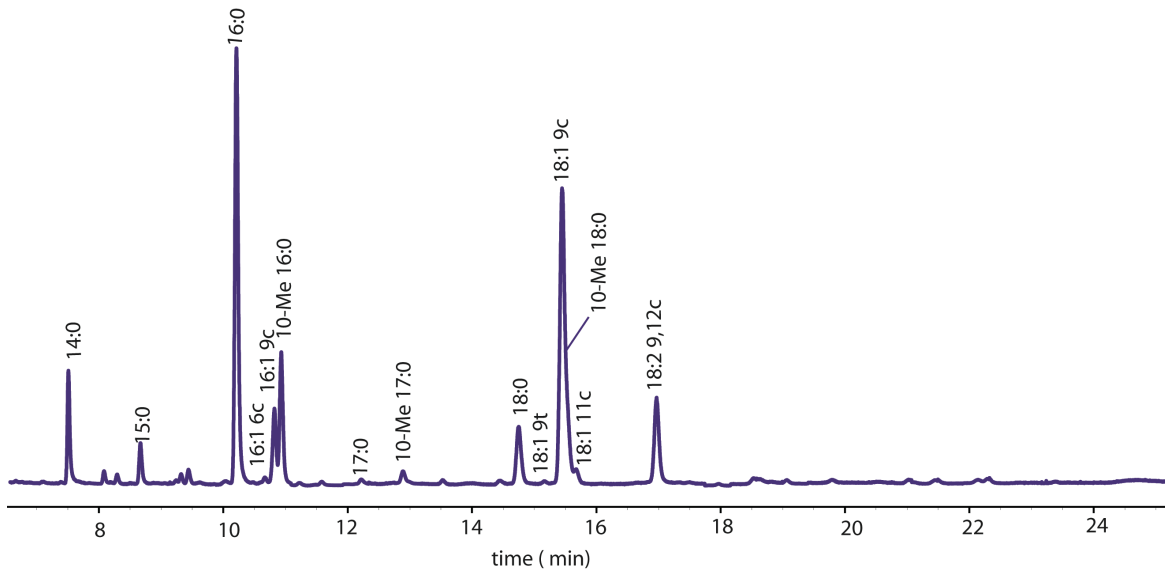

**Supplementary Figure S4.** Representative GC analysis of FAME obtained from BCP1 grown on NAs. The FAME were identified by comparison with the retention times of reference compounds.

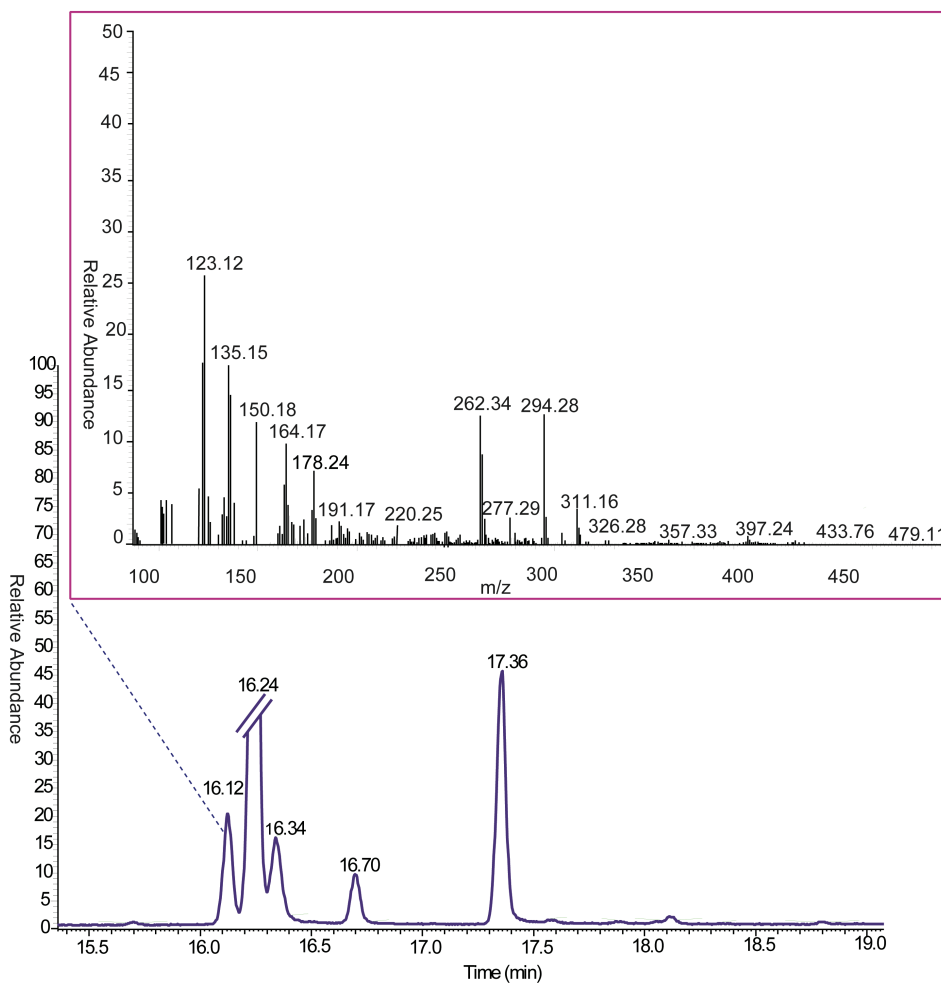

**Supplementary Figure S5.** Section of GC-MS analysis of FAME obtained from BCP1 grown on NAs. In the box is reported the MS of the peak eluted at 16:12 min confirming the presence of linoleic acid (18:2 9c,12c.) The rest of the reported peaks corresponded to the methyl esters of oleic acid (16.24 min), vaccenic acid (16.34 min), stearic acid (16.70 min) and methyl-10 octadecanoic acid (17.36 min).



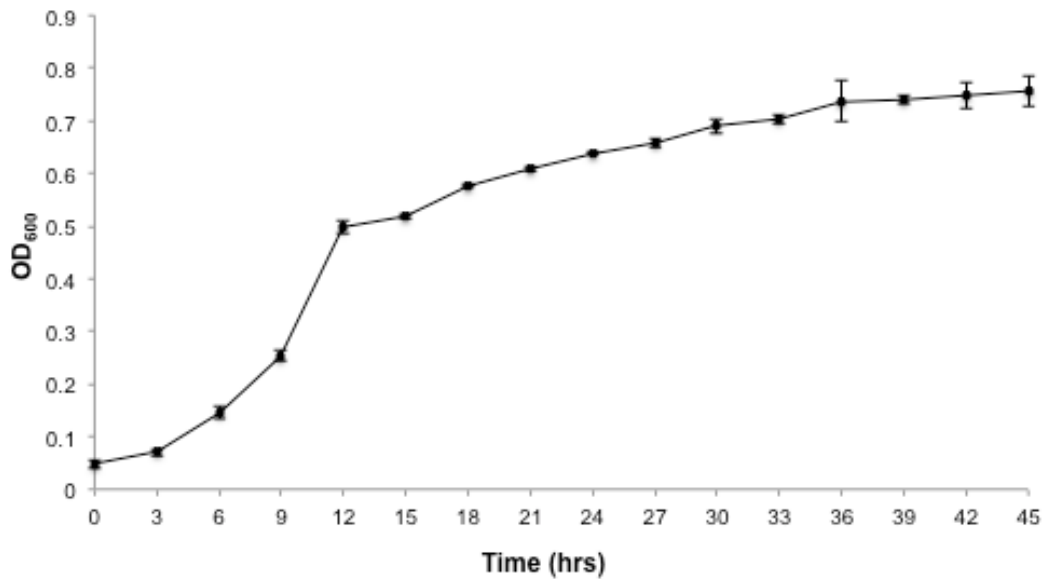

**Supplementary Figure S6.** Growth curve of BCP1 on MSM supplied with glucose (0.1% w/v)
